# Supplementary material for: Combinatorial Glycomic Analyses to Direct CAZyme Discovery for the Tailored Degradation of Canola Meal Non-Starch Dietary Polysaccharides
Source: MDPI journal article supplement (doi:10.3390/microorganisms8121888), 2020-11-29
Supplement: s1 [file s1]

**Cold-pressed CM**

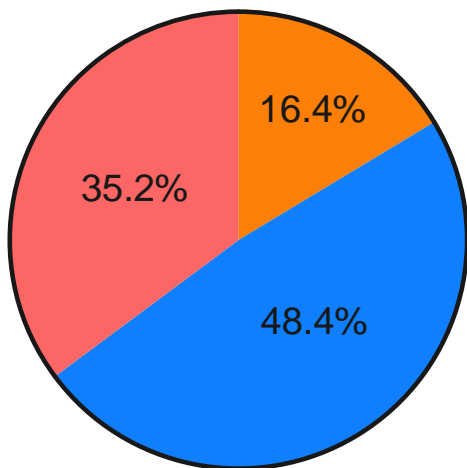

**Solvent-extracted CM**

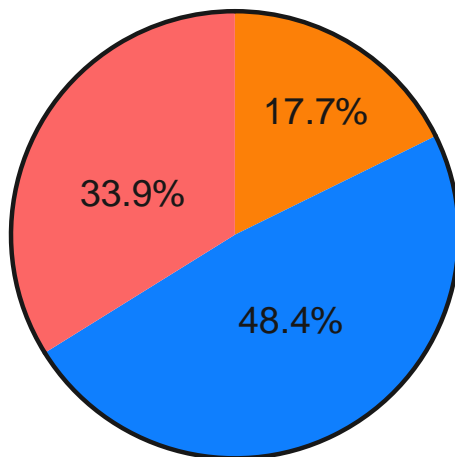

**Cold-pressed CM  
NaBD<sub>4</sub> reduced**

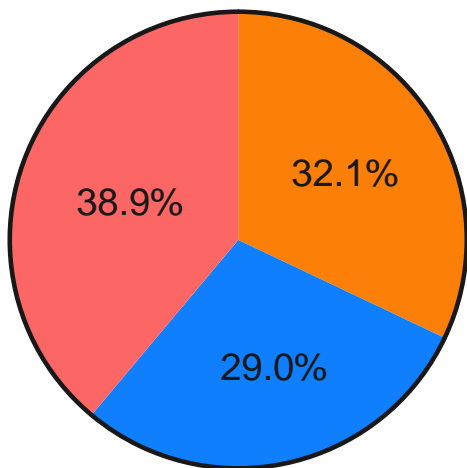

**Solvent-extracted CM  
NaBD<sub>4</sub> reduced**

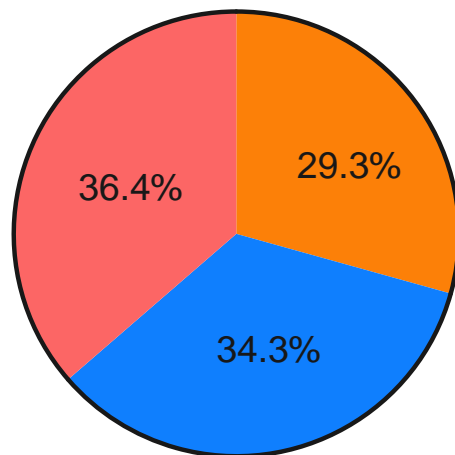

 EDTA+Na<sub>2</sub>CO<sub>3</sub>

 4M KOH

 Residue
