# Supplementary material for: Combinatorial Glycomic Analyses to Direct CAZyme Discovery for the Tailored Degradation of Canola Meal Non-Starch Dietary Polysaccharides
Source: Microorganisms. 2020 Nov 29;8(12):1888. doi: 10.3390/microorganisms8121888 (PMC7761036; doi:10.3390/microorganisms8121888)
Supplement: Supplementary file 1 [file microorganisms-08-01888-s001.zip]

Archive with 7 entries (7 files):
- FigS1_pipeline.pdf
- FigS2_fractionation_yield.pdf
- FigS3_linkages_SE.pdf
- FigS4_poly_comp_SE.pdf
- FigS5_family_abundance.pdf
- Supplemental Figures.docx
- Supplemental Tables.docx
