# Supplementary figures and images for: Combinatorial Glycomic Analyses to Direct CAZyme Discovery for the Tailored Degradation of Canola Meal Non-Starch Dietary Polysaccharides
Source: MDPI journal article supplement (doi:10.3390/microorganisms8121888), 2020-11-29

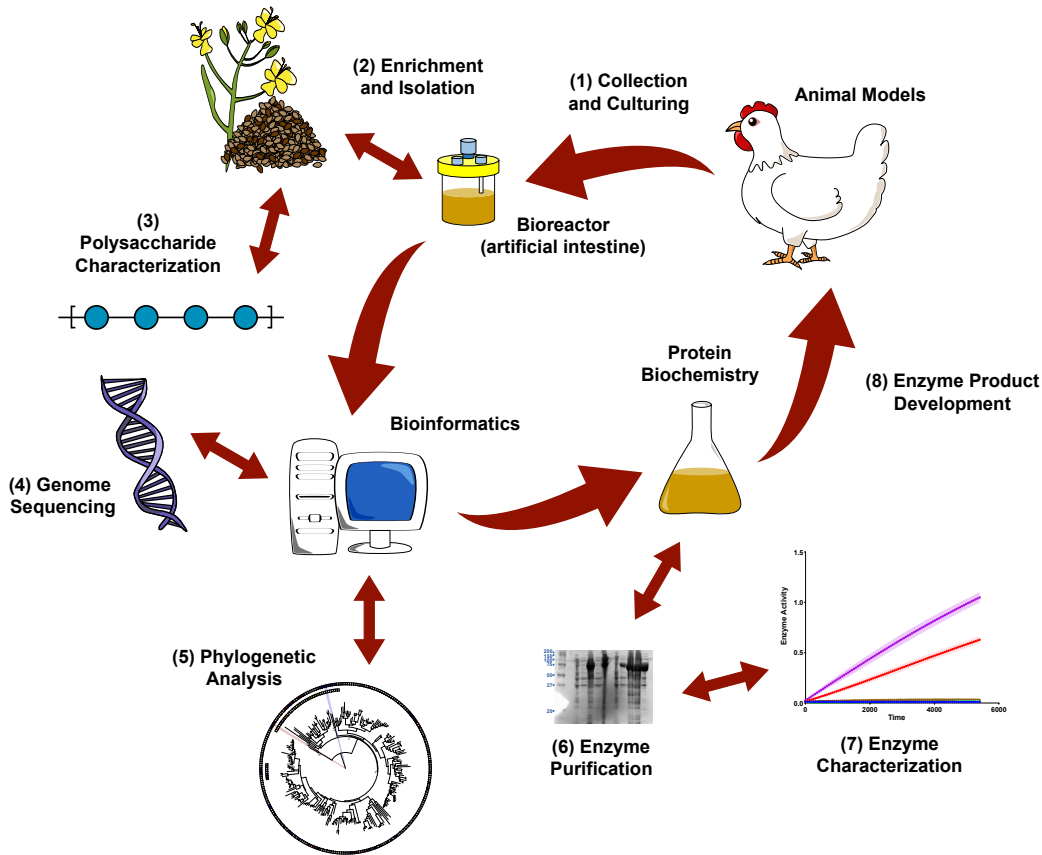

Supplement: s1 [file s1]

**A**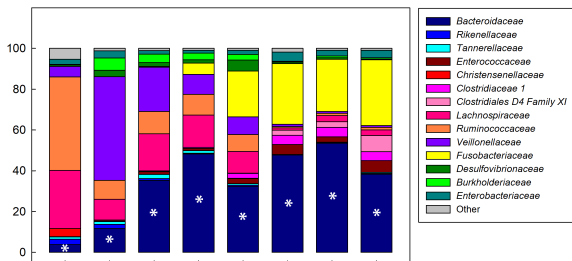**B**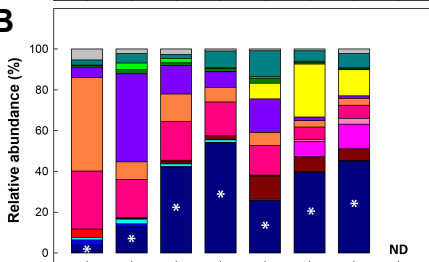**C**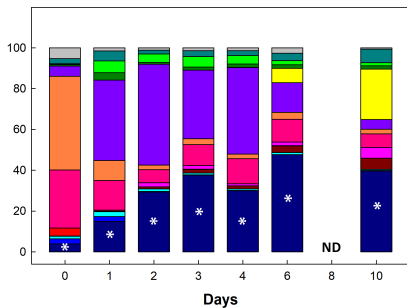

Supplement: s1 [file s1]

**A**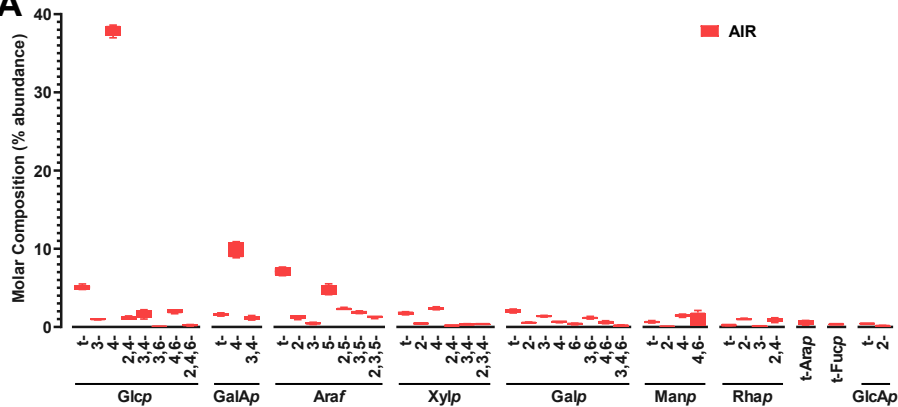**B**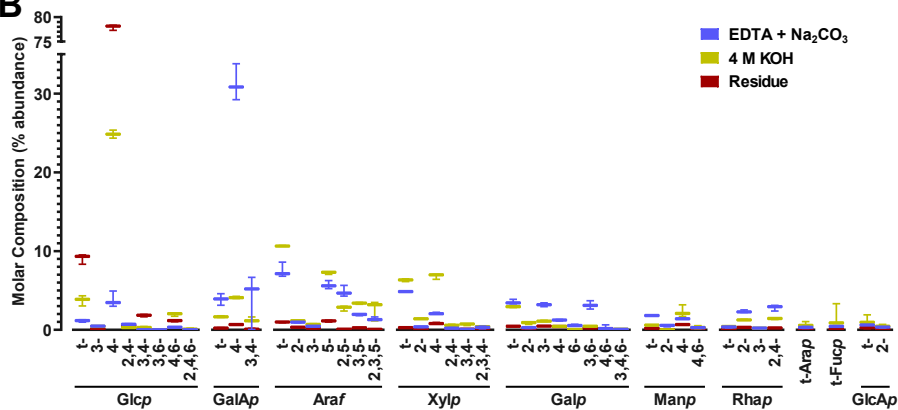

Supplement: s1 [file s1]

Molar Composition (% abundance)

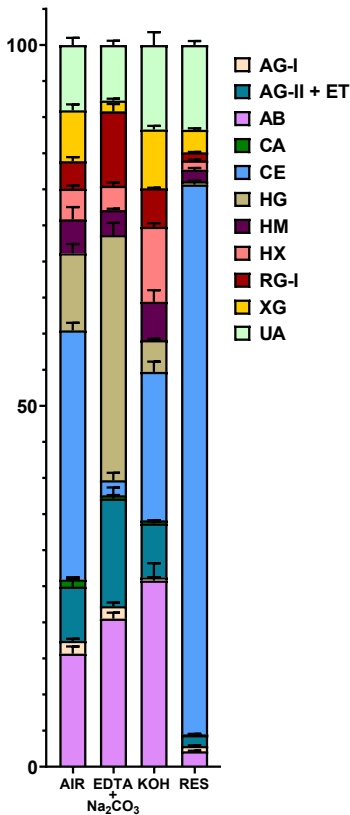

Supplement: s1 [file s1]
